# Supplementary material for: An Evaluation of Machine Learning Approaches for the Prediction of Essential Genes in Eukaryotes Using Protein Sequence-Derived Features
Source: PubMed Central journal article supplement — Comput Struct Biotechnol J. 2019 Jun 8;17:785–96. doi: 10.1016/j.csbj.2019.05.008 (PMC6607062; doi:10.1016/j.csbj.2019.05.008), 2019-06-08
Supplement: mmc1.pdf [file mmc1.pdf]

**SUPPLEMENTARY FIGURES:**

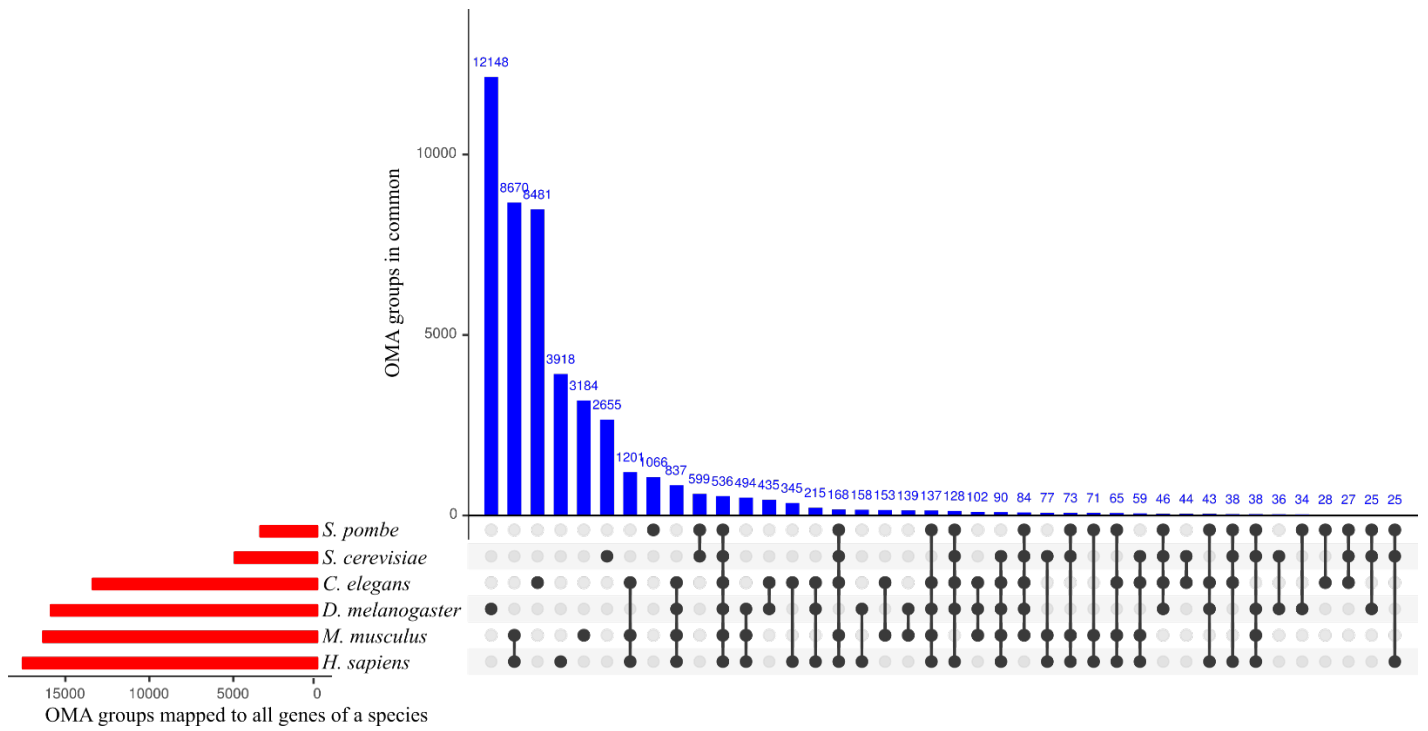

**Fig. S1.** Diagram exhibiting the total (red) and shared (blue) ortholog identifiers (complete predicted proteomes) for the species used in the present study, obtained from the OMA database.

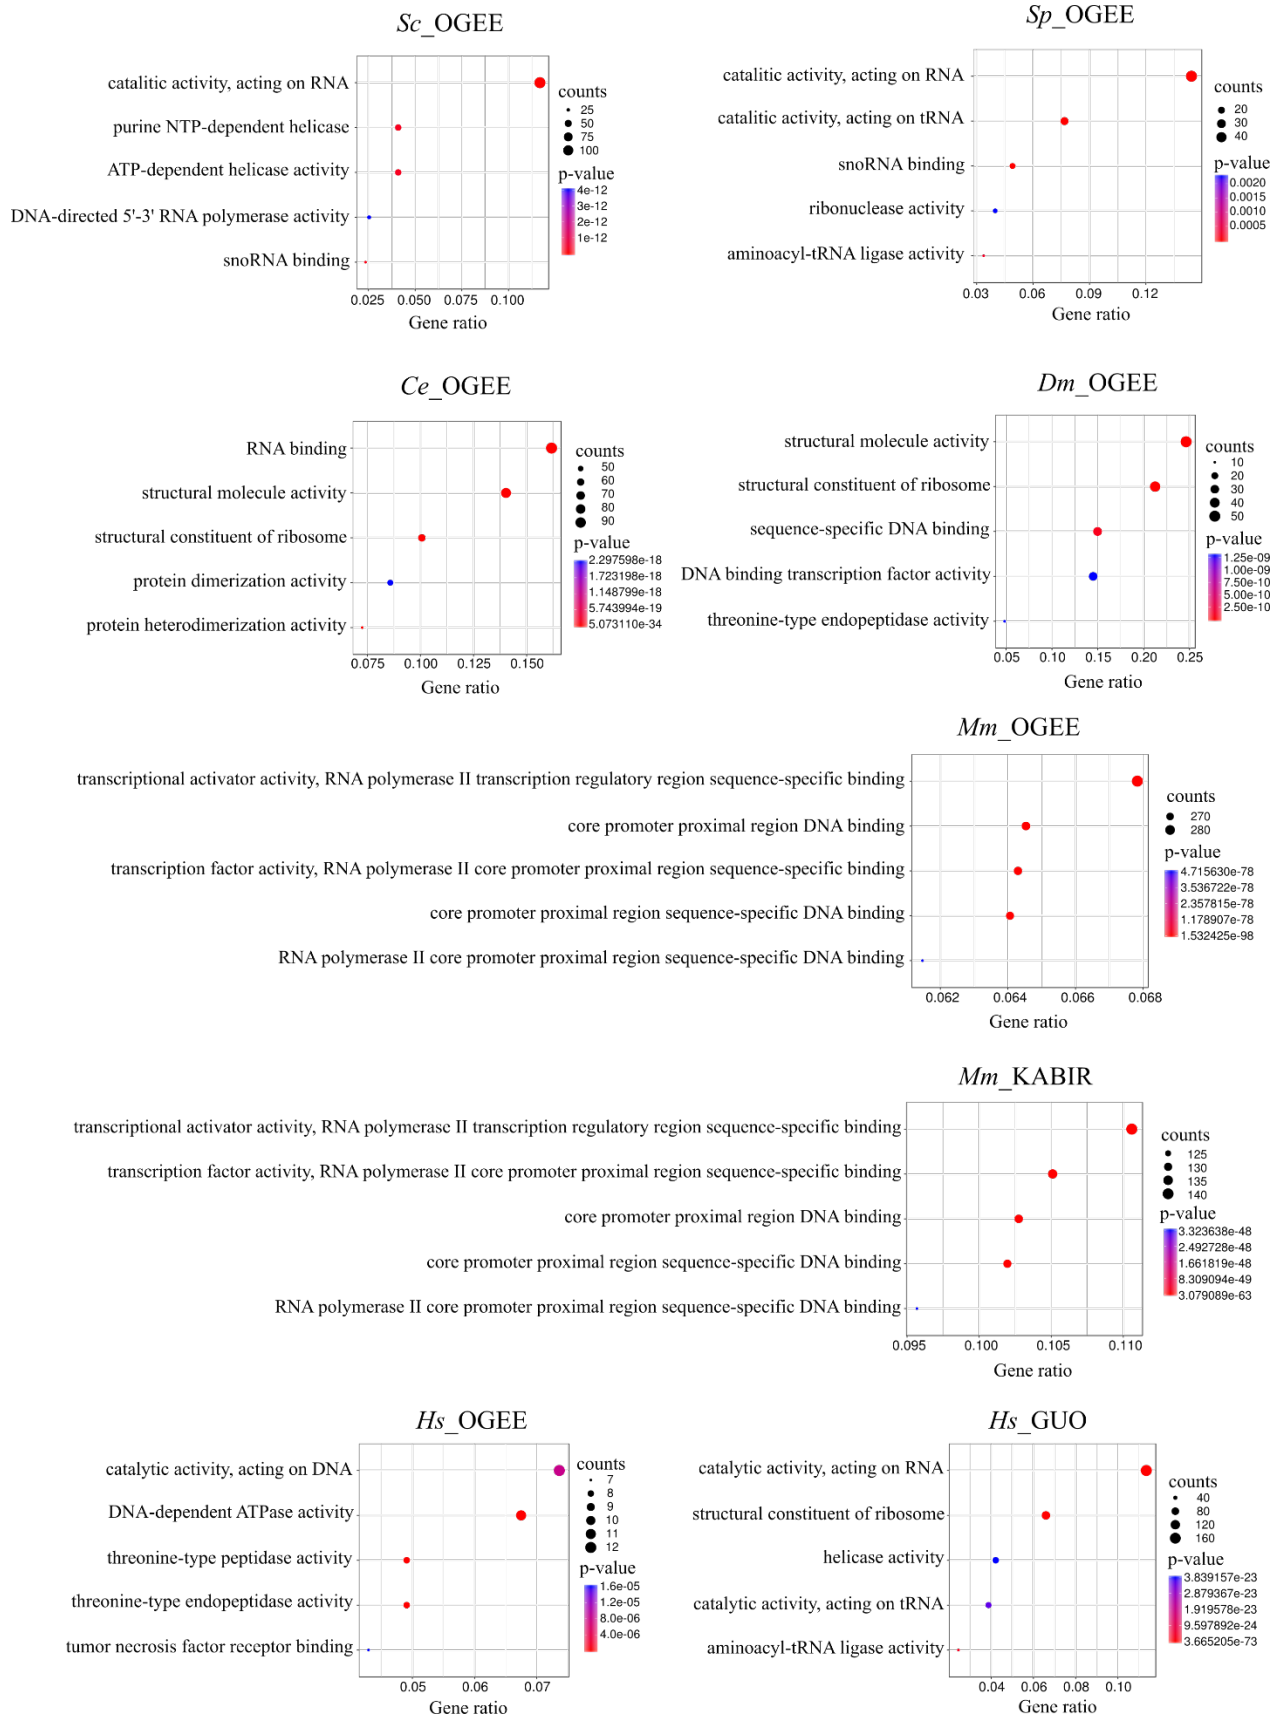

**Fig. S2.** Molecular function enrichment analysis (“enrichGO” function, “clusterProfiler” package in R) of gene ontology terms of essential genes per data set.

| Shared features \ Dataset (#selected features) | Sc_OGEE (118) | Sp_OGEE (156) | Ce_OGEE (215) | Dm_OGEE (123) | Mm_OGEE (260) | Mm_KABIR (44) | Hs_OGEE (129) | Hs_GUO (251) |
|------------------------------------------------|---------------|---------------|---------------|---------------|---------------|---------------|---------------|--------------|
| CTriad_VS666                                   | Green         | Green         | Red           | Red           | Green         | Green         | Green         | Green        |
| CTDD_prop1.G2.residue0                         | Red           | Red           | Green         | Red           | Red           | Green         | Red           | Green        |
| QSO_Schneider.Xr.W                             | Red           | Red           | Red           | Red           | Green         | Green         | Green         | Green        |
| PAAC_Xc1.M                                     | Red           | Red           | Green         | Red           | Green         | Green         | Red           | Green        |
| DC_QI                                          | Green         | Green         | Green         | Red           | Green         | Green         | Red           | Red          |
| DC_PM                                          | Red           | Red           | Green         | Green         | Green         | Green         | Red           | Green        |
| DC_PH                                          | Red           | Green         | Green         | Red           | Green         | Green         | Red           | Green        |
| CTriad_VS636                                   | Green         | Green         | Red           | Red           | Red           | Red           | Red           | Green        |
| CTriad_VS555                                   | Red           | Red           | Red           | Red           | Green         | Green         | Red           | Green        |
| CTriad_VS536                                   | Red           | Green         | Green         | Red           | Red           | Red           | Red           | Green        |
| CTriad_VS521                                   | Red           | Green         | Red           | Red           | Green         | Green         | Red           | Green        |
| CTDD_prop1.G3.residue25                        | Green         | Red           | Green         | Red           | Red           | Red           | Red           | Red          |
| APAAC_Pc1.Q                                    | Green         | Green         | Red           | Green         | Red           | Red           | Red           | Green        |

**Fig. S3.** List of shared features selected by both ElasticNet and Ensemble SPLS methods among at least 4 data sets. The total number of features selected for each species/data set is reported.

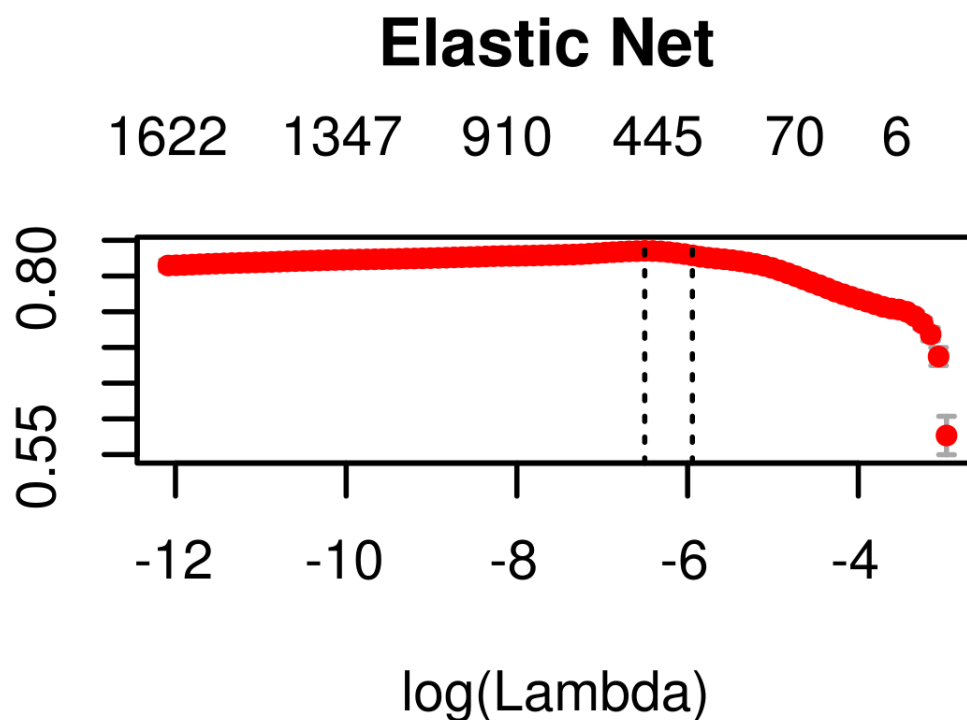

**Fig. S4.** An example of the application of ElasticNet as a feature-selection procedure using *C. elegans* data. The x-axis represents the lambda parameter tested (bottom) and the corresponding retained features (top). The y-axis represents the ROC-AUC using 10-fold cross-validation. The final set of selected features maximises this metric.

## **OTHER SUPPLEMENTARY FILES:**

- Table S1. Selected features of each data set and importance of feature
- R “*Sessioninfo*” file
- Fasta files (data sets) and R scripts (online - <https://bitbucket.org/tuliocampos/essential> and a static version referring to this publication - <http://doi.org/10.6084/m9.figshare.8063069>)
